# Supplementary material for: The influence of model spatial resolution on simulated ozone and fine particulate matter: implications for health impact assessments
Source: Copernicus journal article supplement (doi:10.5194/acp-2017-1074), 2017-11-28
Supplement: Supplementary file 1 [file acp-2017-1074-supplement.pdf]

## S1 Statistical analysis of simulated warm season MDA8 O<sub>3</sub> and annual mean PM<sub>2.5</sub> compared to measurements

**Table S1:** Warm season (April-September) mean of daily maximum 8-hour running mean O<sub>3</sub> concentrations (MDA8 O<sub>3</sub>) and annual mean PM<sub>2.5</sub> concentrations at the global and regional resolutions compared to observations from 52 and 25 stations within the EMEP network, respectively.

| <b>Season</b>                          |                               | <b>Obs.</b> | <b>140 km</b> | <b>50 km</b> |
|----------------------------------------|-------------------------------|-------------|---------------|--------------|
| <b>MDA8 O<sub>3</sub> (Apr - Sept)</b> | Mean ( $\mu\text{g m}^{-3}$ ) | 86.3        | 95.6          | 94.8         |
|                                        | NMB (%)                       |             | 10.9          | 8.9          |
|                                        | SD ( $\mu\text{g m}^{-3}$ )   | 9.2         | 14.7          | 14.2         |
|                                        | <b>Difference (%)</b>         |             |               | 1            |
| <b>PM<sub>2.5</sub> (Annual)</b>       | Mean ( $\mu\text{g m}^{-3}$ ) | 11.4        | 12.6          | 13.7         |
|                                        | NMB (%)                       |             | 10.5          | 20.2         |
|                                        | SD ( $\mu\text{g m}^{-3}$ )   | 5.1         | 2.8           | 5.0          |
|                                        | <b>Difference (%)</b>         |             |               | -9           |

## S2 Seasonal and country level evaluation for O<sub>3</sub>

We further analyse how the seasonality in O<sub>3</sub> concentrations simulated at the two resolutions varies seasonally and also geographically at the country level (Fig. S1). During winter, O<sub>3</sub> concentrations at southerly locations in Greece and Italy (Fig. S1 red box) show the largest differences between the two resolutions, with an overestimate of  $\sim 50 \mu\text{g m}^{-3}$  at the global resolution compared to EMEP measurements. In contrast to the majority of the sites during winter, simulated O<sub>3</sub> concentrations at the regional resolution are higher compared to the global resolution for several locations in Austria, Hungary and Slovakia (red circle). Similar to winter, O<sub>3</sub> concentrations at the same locations in Italy are also largely overestimated by both model resolutions in summer ( $\sim 50 \mu\text{g m}^{-3}$ , Fig. S1c). In autumn, the largest overestimates of low O<sub>3</sub> concentrations at the regional resolution occur at northern European locations in the Netherlands and Belgium, (Fig. S1d - red box).

In spring, summer and autumn, O<sub>3</sub> concentrations simulated at both resolutions in Malta are much higher compared to measurements ( $\sim 40 \mu\text{g m}^{-3}$ ; Fig. S1b, c and d -red circle). This is due to the fact that at both resolutions, the grid box covering the Maltese Islands is represented as ocean and not land. Deposition of O<sub>3</sub> is typically less over the sea than compared to over land, potentially leading to an overestimation in simulated O<sub>3</sub> concentration compared to measurements at this location.

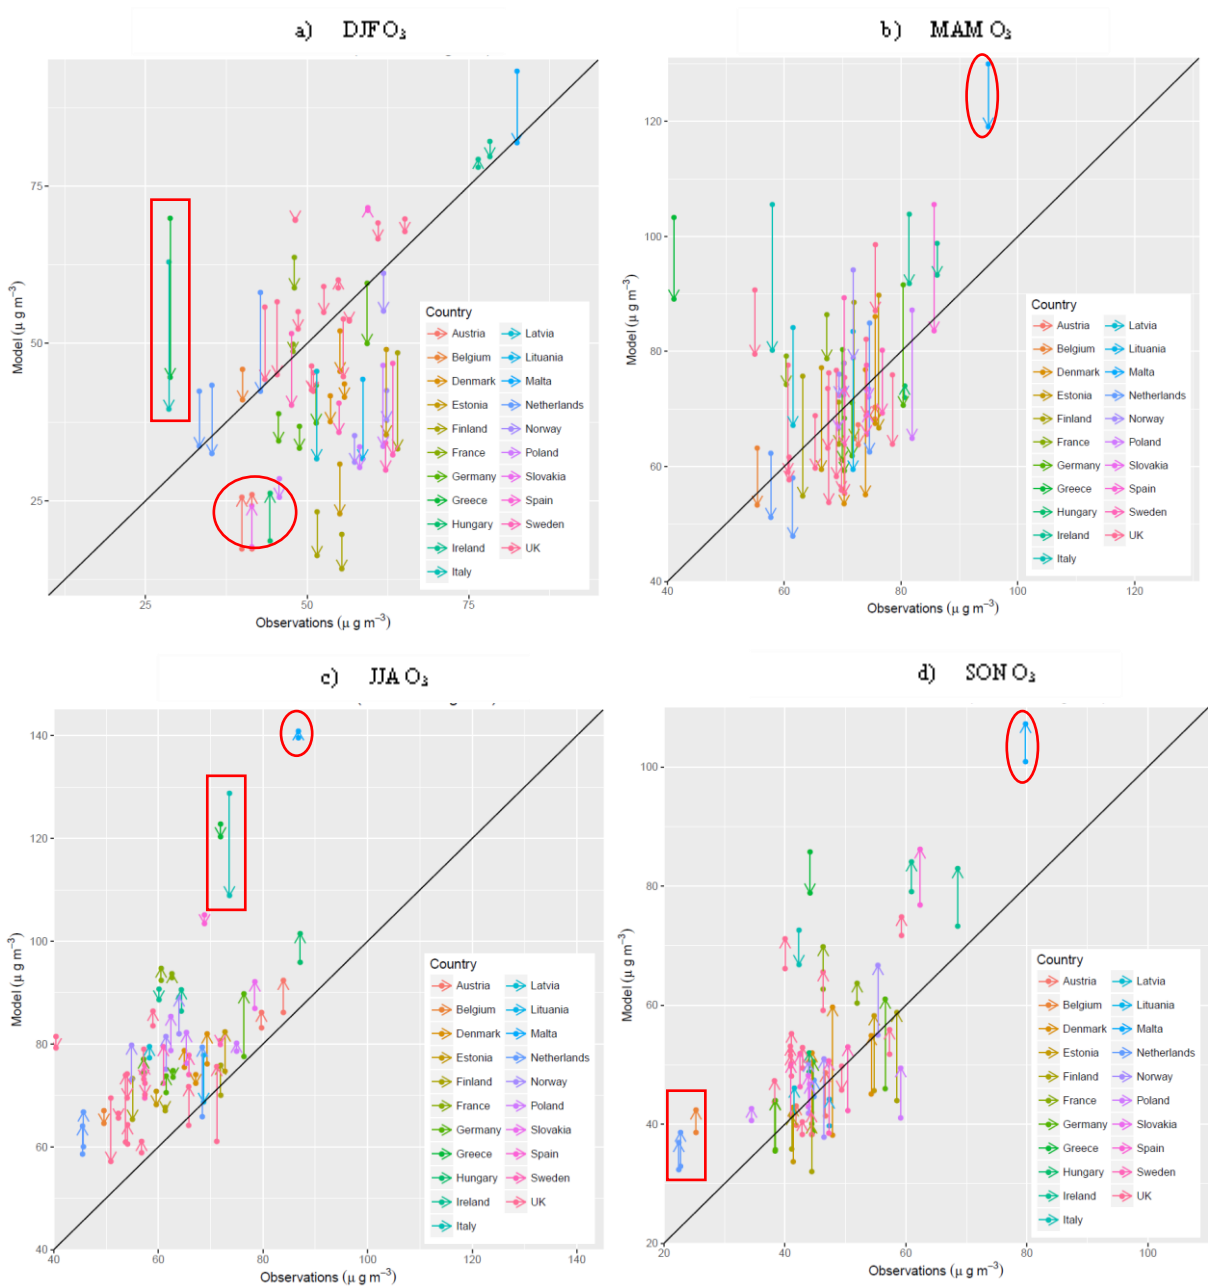

**Figure S1: Modelled versus observed seasonal mean  $O_3$  for a) DJF b) MAM c) JJA d) SON 2007 over a subset of 52 sites across the EMEP network as shown in Fig. 1. The arrow tails mark  $O_3$  concentrations at the global resolution while the arrow heads represent the corresponding  $O_3$  concentrations at the regional resolution.**

### S3 Additional figures on the impact of model resolution on pollutant concentrations

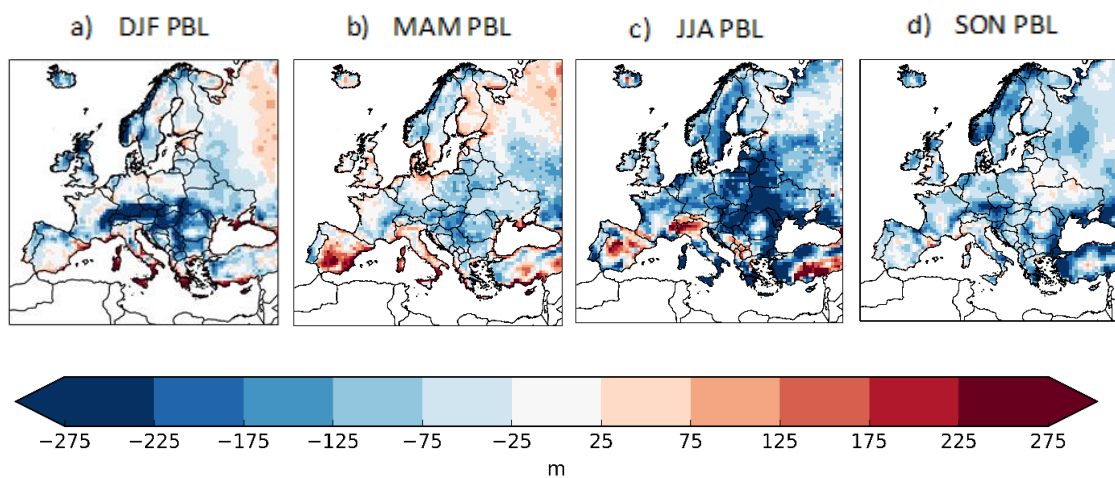

**Figure S2: Difference between global and regional seasonal mean boundary layer height (PBL global resolution – PBL regional resolution) for a) DJF b) MAM c) JJA and d) SON for 2007**

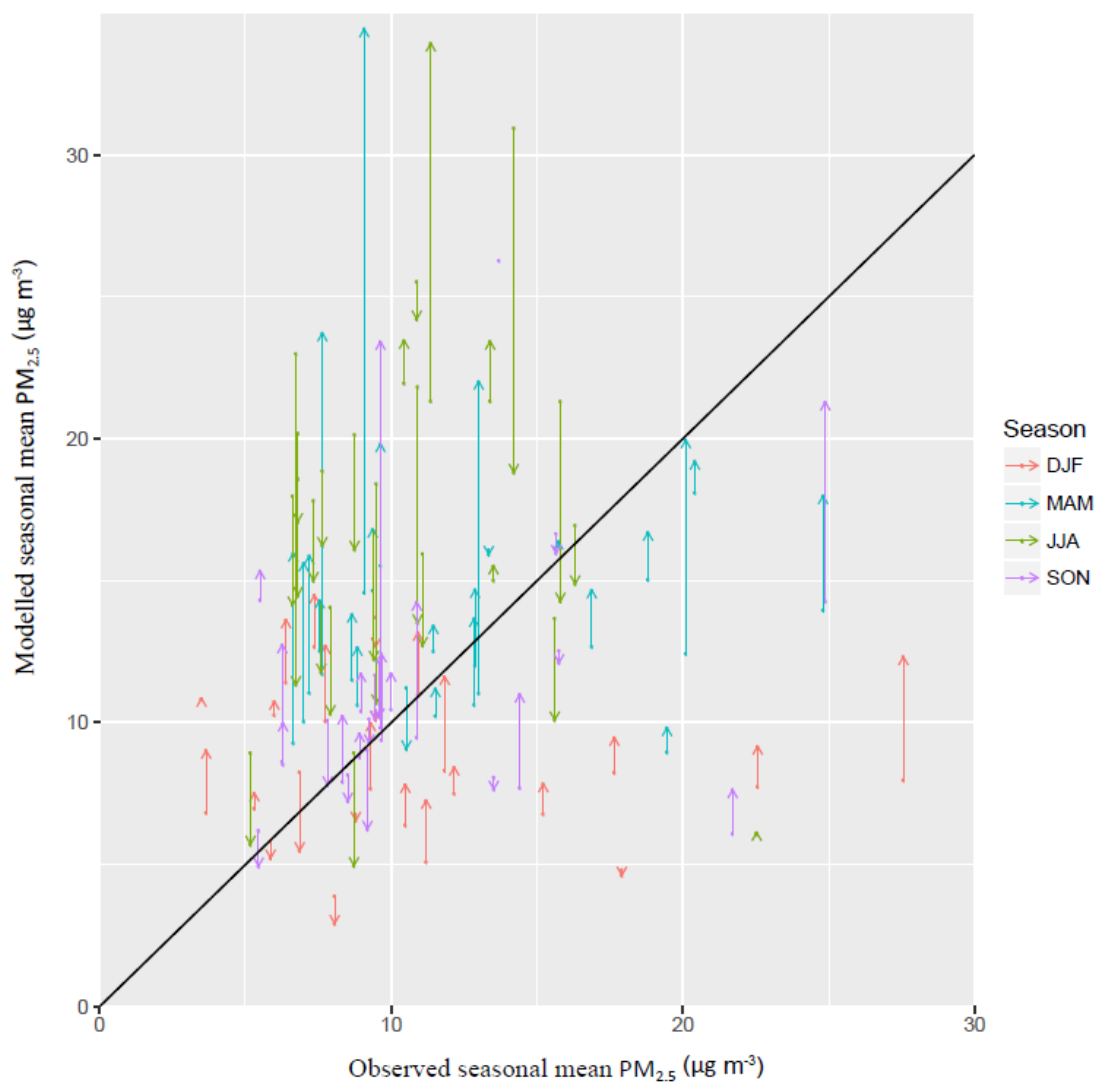

**Figure S3 Seasonal mean modelled vs observed PM<sub>2.5</sub> for 25 sites across the EMEP network for the year 2007. The arrow tails mark PM<sub>2.5</sub> concentrations at the global resolution while the arrow heads represent the corresponding PM<sub>2.5</sub> concentrations at the regional resolution. The 1:1 line shows agreement between observed and simulated PM<sub>2.5</sub>.**

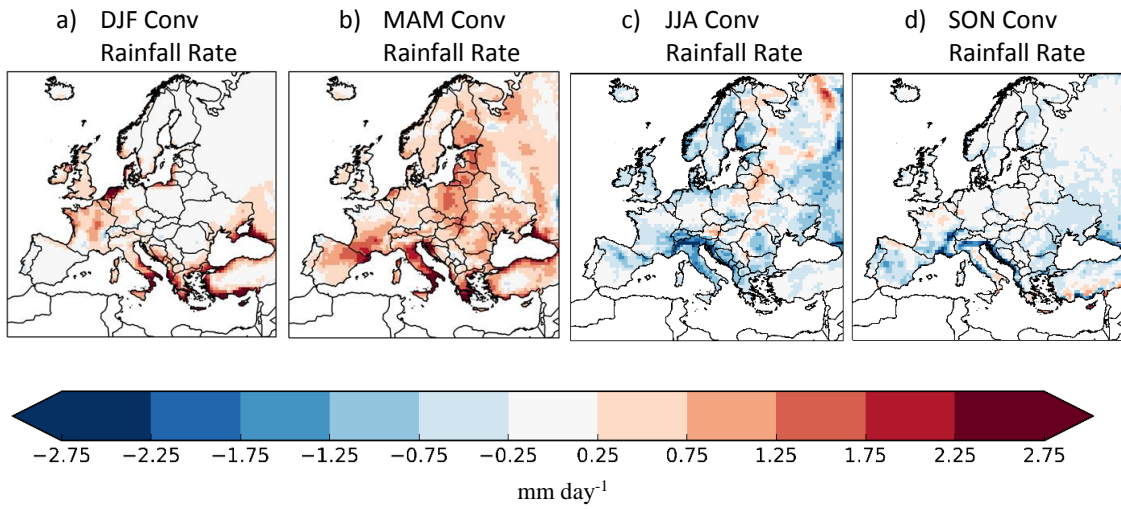

**Figure S4: Difference between global and regional seasonal mean convective rainfall rate ( $\text{mm day}^{-1}$ ) for a) DJF b) MAM c) JJA and d) SON for 2007**

S4 Additional figures on the effect of applying population-weighting to pollutant concentrations

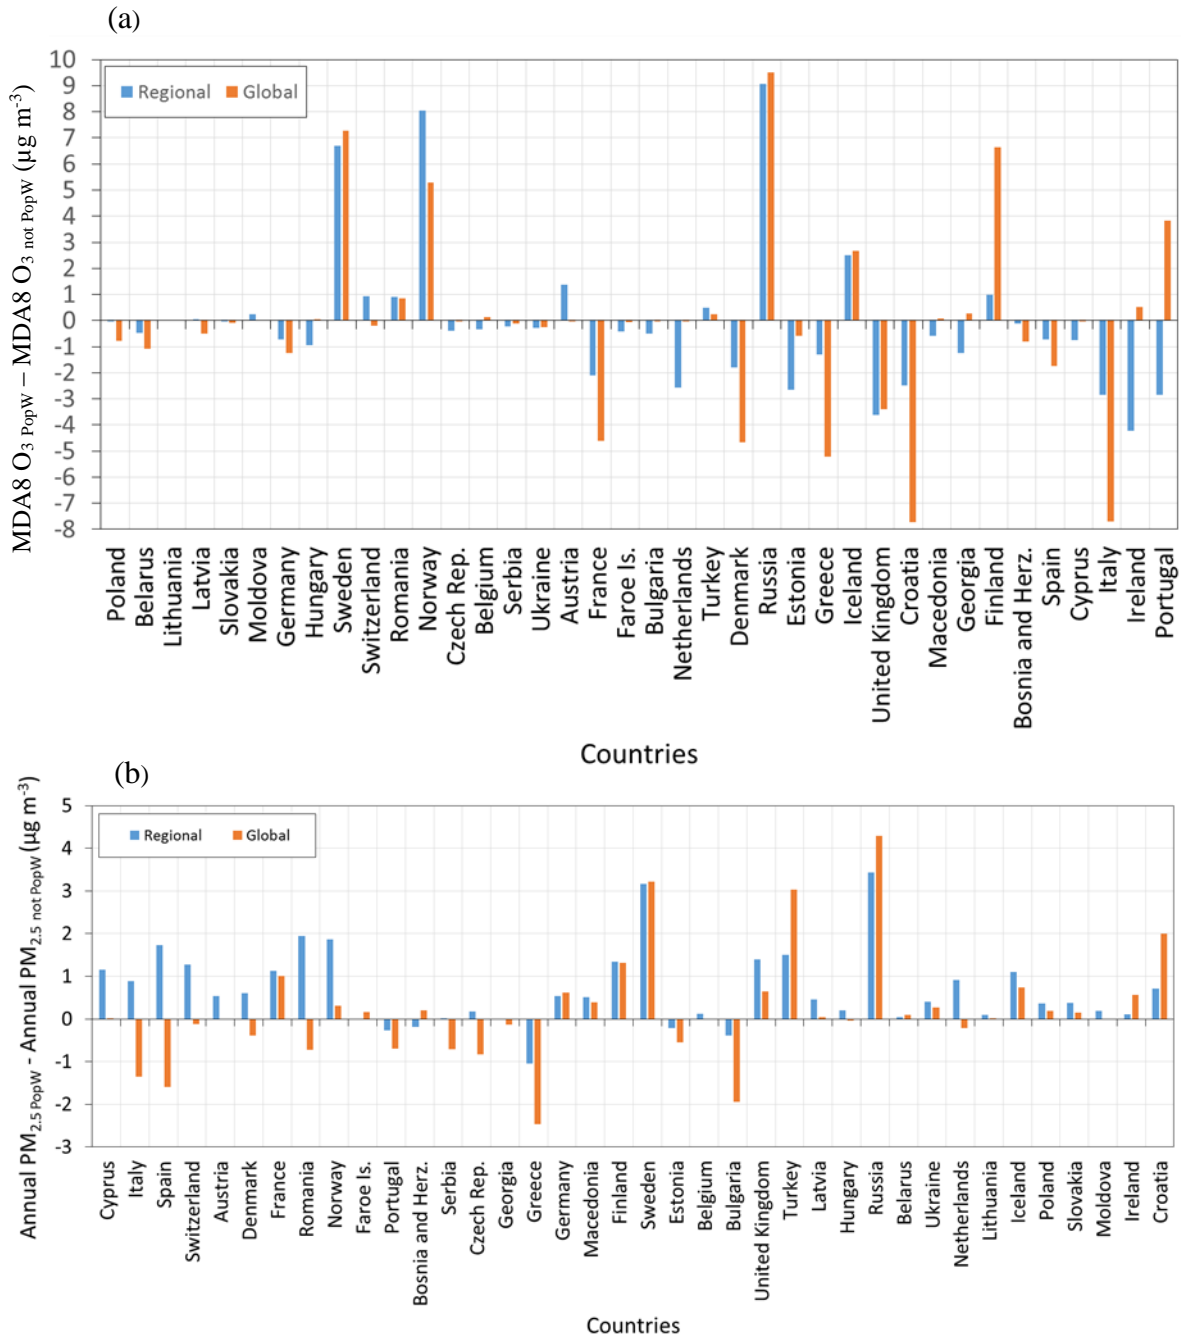

Figure S5: a) Difference between MDA8 O<sub>3</sub> concentrations with and without population-weighting as simulated by the global (orange bars) and regional (blue bars) resolutions b) same holds for annual mean PM<sub>2.5</sub> concentrations.
